# Supplementary material for: The Sex and Race Specific Relationship between Anthropometry and Body Fat Composition Determined from Computed Tomography: Evidence from the Multi-Ethnic Study of Atherosclerosis
Source: PubMed Central journal article supplement (PMC4598154; doi:10.1371/journal.pone.0139559), 2015-10-08
Supplement: pone.0139559.s001.pdf [file pone.0139559.s001.pdf]

S1 Table. Race/ethnicity by sex interactions for visceral fat and anthropometry

| <u>Measure</u>                  | <u>Race</u> | <u>Women</u> |              |              | <u>Men</u>   |              |              |
|---------------------------------|-------------|--------------|--------------|--------------|--------------|--------------|--------------|
|                                 |             | <u>White</u> | <u>Asian</u> | <u>Black</u> | <u>White</u> | <u>Asian</u> | <u>Black</u> |
| <u>Height</u> (cm)              | Asian       |              |              |              |              |              |              |
|                                 | Black       |              |              |              |              |              |              |
|                                 | Hispanic    | ***          | *            | *            | ***          |              | *            |
| <u>Weight</u> (kg)              | Asian       |              |              |              |              |              |              |
|                                 | Black       |              |              |              | *            |              |              |
|                                 | Hispanic    | ***          |              | *            | ***          |              | *            |
| <u>BMI</u> (kg/m <sup>2</sup> ) | Asian       |              |              |              |              |              |              |
|                                 | Black       |              |              |              |              |              |              |
|                                 | Hispanic    | *            |              |              | *            |              |              |
| <u>Waist</u> (cm)               | Asian       | **           |              |              | *            |              |              |
|                                 | Black       | **           | ***          |              | ***          | ***          |              |
|                                 | Hispanic    | ***          | ***          |              | ***          | ***          |              |
| <u>Hip</u> (cm)                 | Asian       |              |              |              |              |              |              |
|                                 | Black       |              |              |              | *            |              |              |
|                                 | Hispanic    | ***          |              |              | ***          |              |              |
| <u>Waist to Hip</u>             | Asian       |              |              |              |              |              |              |
|                                 | Black       | *            |              |              | **           |              |              |
|                                 | Hispanic    |              |              |              |              |              |              |
| <u>Waist to Height</u>          | Asian       |              |              |              |              |              |              |
|                                 | Black       |              |              |              | *            |              |              |
|                                 | Hispanic    |              |              |              |              |              |              |

\*<0.05

\*\*<0.01

\*\*\*<0.001
