# Supplementary material for: The Sex and Race Specific Relationship between Anthropometry and Body Fat Composition Determined from Computed Tomography: Evidence from the Multi-Ethnic Study of Atherosclerosis
Source: PubMed Central journal article supplement (PMC4598154; doi:10.1371/journal.pone.0139559), 2015-10-08
Supplement: pone.0139559.s002.pdf [file pone.0139559.s002.pdf]

**S2 Table. Race/ethnicity by sex interactions for subcutaneous fat and anthropometry**

| <u>Measure</u>                         | <u>Race</u>                | <u>White</u> | <u>Women</u><br><u>Asian</u> | <u>Black</u> | <u>White</u> | <u>Men</u><br><u>Asian</u> | <u>Black</u> |
|----------------------------------------|----------------------------|--------------|------------------------------|--------------|--------------|----------------------------|--------------|
| <b><u>Height</u></b> (cm)              | Asian<br>Black<br>Hispanic |              |                              |              |              |                            |              |
| <b><u>Weight</u></b> (kg)              | Asian<br>Black<br>Hispanic |              |                              |              |              |                            |              |
| <b><u>BMI</u></b> (kg/m <sup>2</sup> ) | Asian<br>Black<br>Hispanic | *            |                              | **           | *            |                            | **           |
| <b><u>Waist</u></b> (cm)               | Asian<br>Black<br>Hispanic |              |                              |              |              |                            |              |
| <b><u>Hip</u></b> (cm)                 | Asian<br>Black<br>Hispanic | *            |                              | **           |              |                            | *            |
| <b><u>Waist to Hip</u></b>             | Asian<br>Black<br>Hispanic |              |                              |              |              |                            |              |
| <b><u>Waist to Height</u></b>          | Asian<br>Black<br>Hispanic |              |                              |              |              |                            |              |

\*<0.05

\*\*<0.01

\*\*\*<0.001
