# Supplementary material for: The Sex and Race Specific Relationship between Anthropometry and Body Fat Composition Determined from Computed Tomography: Evidence from the Multi-Ethnic Study of Atherosclerosis
Source: PubMed Central journal article supplement (PMC4598154; doi:10.1371/journal.pone.0139559), 2015-10-08
Supplement: pone.0139559.s003.pdf [file pone.0139559.s003.pdf]

**S3 Table. Anthropometry by visceral fat missing status in the MESA body composition ancillary study**

| <b>Variable</b>                 | <b>Non-Missing<br/>Mean (SD)</b> | <b>Missing Visceral Fat<br/>Mean (SD)</b> | <b>Imputed Visceral Fat<br/>Mean (SD)</b> | <b>P-value:<br/>Non-Missing vs. Missing</b> |
|---------------------------------|----------------------------------|-------------------------------------------|-------------------------------------------|---------------------------------------------|
| N                               | 1898                             | 24                                        | 25                                        |                                             |
| Visceral fat (cm <sup>2</sup> ) | 149.6 (1.61)                     | NA                                        | 258.8 (8.13)                              |                                             |
| Age (years)                     | 62.0 (0.22)                      | 64.8 (1.91)                               | 64.3 (2.13)                               | <0.001                                      |
| Female (%)                      | 50.1 (1.15)                      | 16.7 (7.78)                               | 32.0 (9.52)                               | <0.001                                      |
| Height (cm)                     | 166.3 (0.23)                     | 170.7 (1.51)                              | 170.7 (2.82)                              | <0.001                                      |
| Weight (kg)                     | 77.6 (0.38)                      | 101.2 (4.02)                              | 97.3 (2.79)                               | <0.001                                      |
| BMI (kg/m <sup>2</sup> )        | 28.0 (0.12)                      | 34.6 (1.14)                               | 33.6 (0.98)                               | <0.001                                      |
| Waist circumference (cm)        | 97.8 (0.32)                      | 118.5 (2.70)                              | 113.6 (1.92)                              | <0.001                                      |
| Hip Circumference (cm)          | 104.1 (0.25)                     | 115.4 (2.12)                              | 114.3 (2.06)                              | <0.001                                      |
| Waist to Hip Ratio              | 0.94 (0.002)                     | 1.03 (0.013)                              | 1.00 (0.009)                              | <0.001                                      |
| Waist to Height Ratio           | 0.59 (0.002)                     | 0.69 (0.015)                              | 0.67 (0.019)                              | <0.001                                      |
