# Supplementary material for: The Sex and Race Specific Relationship between Anthropometry and Body Fat Composition Determined from Computed Tomography: Evidence from the Multi-Ethnic Study of Atherosclerosis
Source: PubMed Central journal article supplement (PMC4598154; doi:10.1371/journal.pone.0139559), 2015-10-08
Supplement: pone.0139559.s004.pdf [file pone.0139559.s004.pdf]

**S4 Table. Anthropometry by subcutaneous fat (cm<sup>2</sup>) missing status in the MESA body composition ancillary study**

| <b><u>Variable</u></b>   | <b><u>Directly Measured Mean (SD)</u></b> | <b><u>Completely Missing Mean (SD)</u></b> | <b><u>Filled with half process Mean (SD)</u></b> | <b><u>Filled with regression equations Mean (SD)</u></b> | <b><u>P-value: Measured vs. Missing</u></b> | <b><u>P-value: Measured vs. Half process</u></b> | <b><u>P-value: Measured vs. Regression</u></b> |
|--------------------------|-------------------------------------------|--------------------------------------------|--------------------------------------------------|----------------------------------------------------------|---------------------------------------------|--------------------------------------------------|------------------------------------------------|
| N                        | 1,404                                     | 172                                        | 219                                              | 152                                                      |                                             |                                                  |                                                |
| Age (years)              | 61.80 (0.26)                              | 63.55 (0.77)                               | 62.41 (0.28)                                     | 62.41 (0.78)                                             | 0.030                                       | 0.40                                             | 0.45                                           |
| Female (%)               | 48.29 (1.33)                              | 32.56 (3.58)                               | 57.53 (3.35)                                     | 67.76 (3.80)                                             | <0.001                                      | 0.010                                            | <0.001                                         |
| Height (cm)              | 166.37 (0.26)                             | 169.51 (0.78)                              | 165.27 (0.69)                                    | 164.92 (0.74)                                            | <0.001                                      | 0.14                                             | 0.064                                          |
| Weight (kg)              | 75.01 (0.42)                              | 94.55 (1.26)                               | 78.60 (0.98)                                     | 88.11 (1.22)                                             | <0.001                                      | 0.001                                            | <0.001                                         |
| BMI (kg/m <sup>2</sup> ) | 26.99 (0.12)                              | 32.98 (0.42)                               | 28.72 (0.30)                                     | 32.43 (0.42)                                             | <0.001                                      | <0.001                                           | <0.001                                         |
| Waist circumference (cm) | 95.03 (0.35)                              | 112.31 (1.00)                              | 100.10 (0.77)                                    | 109.60 (1.00)                                            | <0.001                                      | <0.001                                           | <0.001                                         |
| Hip Circumference (cm)   | 102.11 (0.25)                             | 113.28 (0.92)                              | 105.32 (0.62)                                    | 114.06 (0.99)                                            | <0.001                                      | <0.001                                           | <0.001                                         |
| Waist to Hip Ratio       | 0.93 (0.002)                              | 0.99 (0.005)                               | 0.95 (0.005)                                     | 0.96 (0.006)                                             | <0.001                                      | <0.001                                           | <0.001                                         |
| Waist to Height Ratio    | 0.57 (0.002)                              | 0.67 (0.007)                               | 0.61 (0.005)                                     | 0.67 (0.007)                                             | <0.001                                      | <0.001                                           | <0.001                                         |
